# Supplementary material for: The Role of Selected Psychological Factors in Healthy-Sustainable Food Consumption Behaviors during the COVID-19 Pandemic
Source: MDPI journal article supplement (doi:10.3390/foods11131944), 2022-06-29
Supplement: s1 [file s1]

## Supplementary Materials

**Table S1.** Results of the CatPCA on the 5 items of the sustainable food groups.

| Dimension | Cronbach's Alpha | Eigenvalues | % Variance |
|-----------|------------------|-------------|------------|
| 1         | 0.587            | 1.884       | 37.689     |
| 2         | -0.077           | 0.942       | 18.834     |
| 3         | -0.162           | 0.886       | 17.71      |
| 4         | -0.513           | 0.709       | 14.178     |
| 5         | -0.907           | 0.579       | 11.589     |
| Total     | 1                | 5           | 100        |

**Table S2.** CatPCA component loadings for the five items (sustainable food group) for the first component.

| Change on food consumption | Component loading |
|----------------------------|-------------------|
| Vegetables-based dishes    | 0.710             |
| Legumes                    | 0.696             |
| Whole grain cereals        | 0.619             |
| Fresh fruits               | 0.585             |
| Nuts and oil seeds         | 0.425             |

**Table S3.** Results of the CatPCA on the 6 items of the non-sustainable food group.

| Dimension | Cronbach's Alpha | Eigenvalues | % Variance |
|-----------|------------------|-------------|------------|
| 1         | 0.510            | 1.739       | 28.990     |
| 2         | -0.006           | 0.995       | 16.584     |
| 3         | -0.053           | 0.958       | 15.964     |
| 4         | -0.249           | 0.828       | 13.804     |
| 5         | -0.346           | 0.776       | 12.936     |
| 6         | -0.506           | 0.703       | 11.722     |
| Total     | 1                | 6           | 100        |

**Table S4.** CatPCA component loadings for the six items (non-sustainable food group) respect the first component.

| Change on food consumption | Component loading |
|----------------------------|-------------------|
| Carb-based dishes          | 0.628             |
| Meat-based dishes          | 0.378             |
| Dairy products             | 0.576             |
| Sweets and desserts        | 0.664             |
| Sugary beverage            | 0.515             |

**Table S5.** Results of the PCA on the CCSF and CCNSF

| Dimension | Eigenvalues | % Variance |
|-----------|-------------|------------|
| 1         | 1.188       | 59.402     |
| 2         | 0.812       | 40.598     |
| Total     | 2           | 100        |

**Table S6.** Between-group comparisons on the HST index means scores and the socio-demographic, household, and clinical variables.

| <b>Variable</b>                                  | <b>Mean(SD)</b> | <b>F</b> | <b>p</b> |
|--------------------------------------------------|-----------------|----------|----------|
| Generational cohort                              |                 | 2.751    | 0.017    |
| <i>Gen Z (18-24)</i>                             | 0.12(1.0)*°     |          |          |
| <i>Young Millennials (25-29)</i>                 | 0.03(1.0)       |          |          |
| <i>Adult Millennials (30-40)</i>                 | -0.07(1.0)*     |          |          |
| <i>Gen X (41-55)</i>                             | -0.07(1.0)°     |          |          |
| <i>Baby Boomers (56-76)</i>                      | 0.05(0.9)       |          |          |
| <i>Elderly (over 77)</i>                         | -0.05(0.6)      |          |          |
| Educational level                                |                 | 0.105    | 0.957    |
| <i>Up to middle school</i>                       | 0.03(0.9)       |          |          |
| <i>High School</i>                               | -0.01(1.0)      |          |          |
| <i>Graduate</i>                                  | -0.01(1.0)      |          |          |
| <i>Post-graduate</i>                             | 0.02(0.9)       |          |          |
| Household economic condition                     |                 | 1.068    | 0.371    |
| <i>Strongly detrimental</i>                      | 0.01(1.1)       |          |          |
| <i>Slightly detrimental</i>                      | -0.07(0.9)      |          |          |
| <i>No effect</i>                                 | 0.03(1.0)       |          |          |
| <i>Slightly beneficial</i>                       | 0.05(1.0)       |          |          |
| <i>Strongly beneficial</i>                       | 0.04(1.3)       |          |          |
| Working condition                                |                 | 3.159    | 0.024    |
| <i>From home (always or most days)</i>           | 0.04(1.0)*      |          |          |
| <i>Not working (on leave, unemployed etc.)</i>   | -0.04(1.1)      |          |          |
| <i>Essential sector (working as usual)</i>       | -0.20(0.9)*     |          |          |
| <i>Other (students, retired, or unspecified)</i> | -0.01(0.9)      |          |          |
| Household composition                            |                 | 0.639    | 0.635    |
| <i>Single</i>                                    | 0.06(1.0)       |          |          |
| <i>Couple</i>                                    | 0.01(1.0)       |          |          |
| <i>3 people</i>                                  | -0.01(0.9)      |          |          |
| <i>4-5 people</i>                                | -0.05(0.9)      |          |          |
| <i>6 people or more</i>                          | 0.01(0.8)       |          |          |
| Body Mass Index (BMI)                            |                 | 7.263    | <0.001   |
| <i>Underweight</i>                               | 0.33(0.8)*°§    |          |          |
| <i>Normal weight</i>                             | 0.03(0.9)*^     |          |          |
| <i>Overweight</i>                                | -0.14(1.1)°^    |          |          |
| <i>Obese</i>                                     | -0.06(1.1)§     |          |          |

Notes. Means scores and Standard Deviations (SD) of the HST index are reported. One-way ANOVA test was conducted with the psychological variables as independent factors and the HST as dependent factor. *F*, Fisher's coefficient. \*, °, §, and ^, Between-groups means differences are significant ( $p < 0.05$ ) at multi comparisons LSD post-hoc test procedure.
